# Supplementary material
Source: PubMed Central journal article supplement (PMC4215253)
Supplement: supp_M114.603894_jbc.M114.603894-1.pdf [file supp_M114.603894_jbc.M114.603894-1.pdf]

## SUPPLEMENTAL DATA

## A Critical Role for Lysine 685 in Gene Expression Mediated by Unphosphorylated STAT3

Maupali Dasgupta<sup>1</sup>, Hamiyet Unal<sup>2</sup>, Belinda Willard<sup>3</sup>, Jinbo Yang<sup>1,4</sup>, Sadashiva S. Karnik<sup>2</sup>  
and George R. Stark<sup>1</sup>

## Supplemental Tables:

Table S1: Genes induced in hTERT-HME1 cells expressing high level of Wt-STAT3

| Genes            | Wt/V<br>Fold Change | Wt/K685R<br>Fold Change |
|------------------|---------------------|-------------------------|
| <i>CDC45L</i>    | 5.26                | 7.35                    |
| <i>IL7R</i>      | 5.13                | 5.58                    |
| <i>CSF2</i>      | 5.04                | 18.74                   |
| <i>MT1G</i>      | 4.56                | 5.38                    |
| <i>DMBT1</i>     | 4.32                | 5.97                    |
| <i>UHRF1</i>     | 4.1                 | 3.44                    |
| <i>KIFC1</i>     | 4.06                | 4.3                     |
| <i>MRGPRX3</i>   | 4.03                | 5.02                    |
| <i>GINS2</i>     | 3.96                | 2.94                    |
| <i>TXNIP</i>     | 3.81                | 0.14                    |
| <i>DLGAP5</i>    | 3.78                | 5.84                    |
| <i>RAD51AP1</i>  | 3.58                | 4.63                    |
| <i>CPA4</i>      | 3.48                | 1.47                    |
| <i>DLGAP5</i>    | 3.38                | 4.62                    |
| <i>SOD2</i>      | 3.3                 | 2.59                    |
| <i>FANCD2</i>    | 3.27                | 2.62                    |
| <i>ARHGDIB</i>   | 3.24                | 5.72                    |
| <i>SLC7A2</i>    | 3.22                | 2.07                    |
| <i>LOC441019</i> | 3.2                 | 3.37                    |
| <i>SMTN</i>      | 3.12                | 2.84                    |
| <i>MTE</i>       | 3.06                | 2.79                    |
| <i>MCM4</i>      | 3.04                | 2.61                    |
| <i>CDCA5</i>     | 3.04                | 5.04                    |
| <i>MCM5</i>      | 2.99                | 3.03                    |
| <i>PBK</i>       | 2.95                | 3.85                    |
| <i>LOC399942</i> | 2.89                | 3.76                    |
| <i>KIF20A</i>    | 2.88                | 3.31                    |

|                     |      |      |
|---------------------|------|------|
| <i>NCAPG</i>        | 2.81 | 6.03 |
| <i>FEN1</i>         | 2.8  | 3.65 |
| <i>ACAT2</i>        | 2.8  | 3.91 |
| <i>PLK4</i>         | 2.79 | 3.08 |
| <i>ANLN</i>         | 2.76 | 3.52 |
| <i>KNTC1</i>        | 2.75 | 2.14 |
| <i>LOC100133565</i> | 2.74 | 1.29 |
| <i>ALDH3A1</i>      | 2.7  | 0.32 |
| <i>CENPK</i>        | 2.68 | 3.95 |
| <i>BUB1</i>         | 2.59 | 6.43 |
| <i>DHCR7</i>        | 2.56 | 3.47 |
| <i>PKM2</i>         | 2.53 | 1.3  |
| <i>TUBA1A</i>       | 2.52 | 2.66 |
| <i>SERPINE1</i>     | 2.52 | 1.49 |
| <i>PRC1</i>         | 2.51 | 3.38 |
| <i>S1PR3</i>        | 2.5  | 2.15 |
| <i>GRB14</i>        | 2.5  | 2.86 |
| <i>NUDT1</i>        | 2.48 | 2.99 |
| <i>LOC647000</i>    | 2.48 | 2.28 |
| <i>CSF3</i>         | 2.47 | 2.21 |
| <i>LOC92755</i>     | 2.47 | 2.04 |
| <i>TUBA1A</i>       | 2.46 | 2.76 |
| <i>TTK</i>          | 2.44 | 3.71 |
| <i>CCNA2</i>        | 2.41 | 3.26 |
| <i>TUBA1B</i>       | 2.38 | 3.44 |
| <i>WASF2</i>        | 2.36 | 0.76 |
| <i>MCM6</i>         | 2.35 | 2.39 |
| <i>STIL</i>         | 2.35 | 2.87 |
| <i>TPX2</i>         | 2.34 | 3.36 |
| <i>LOC441763</i>    | 2.32 | 1.29 |
| <i>TIMELESS</i>     | 2.31 | 2.37 |
| <i>TUBB2C</i>       | 2.3  | 1.9  |
| <i>CSF3</i>         | 2.29 | 2.18 |
| <i>MELK</i>         | 2.28 | 2.87 |
| <i>TOP2A</i>        | 2.28 | 3.5  |
| <i>KIAA0101</i>     | 2.27 | 1.94 |
| <i>PSMD2</i>        | 2.27 | 1.75 |
| <i>DEPDC1</i>       | 2.27 | 4.09 |
| <i>HIST2H2AA4</i>   | 2.25 | 1.22 |
| <i>FANCI</i>        | 2.25 | 4.72 |
| <i>POLA2</i>        | 2.24 | 3.02 |
| <i>DHCR7</i>        | 2.24 | 2.19 |
| <i>TUBB</i>         | 2.24 | 2.14 |

|                     |      |      |
|---------------------|------|------|
| <i>MAGED1</i>       | 2.24 | 1.55 |
| <i>KRT5</i>         | 2.24 | 0.67 |
| <i>RFC5</i>         | 2.23 | 2.42 |
| <i>CDK2</i>         | 2.22 | 1.61 |
| <i>STC1</i>         | 2.22 | 2.38 |
| <i>MTIX</i>         | 2.22 | 1.58 |
| <i>TUBA1C</i>       | 2.22 | 2.5  |
| <i>LOC729816</i>    | 2.21 | 3.28 |
| <i>MAGED1</i>       | 2.19 | 1.59 |
| <i>GLA</i>          | 2.17 | 1.74 |
| <i>LOC647000</i>    | 2.17 | 2.18 |
| <i>NAVI</i>         | 2.16 | 1.21 |
| <i>CKAP2L</i>       | 2.16 | 4.61 |
| <i>SPC24</i>        | 2.16 | 2.43 |
| <i>LDB2</i>         | 2.15 | 3.77 |
| <i>KIF23</i>        | 2.15 | 3.74 |
| <i>MCM3</i>         | 2.15 | 1.59 |
| <i>GCNT1</i>        | 2.15 | 2    |
| <i>RRM1</i>         | 2.14 | 1.87 |
| <i>SNRNP70</i>      | 2.14 | 0.86 |
| <i>C6orf173</i>     | 2.14 | 3.91 |
| <i>KIF14</i>        | 2.13 | 3.29 |
| <i>CENPF</i>        | 2.13 | 3.01 |
| <i>SOD2</i>         | 2.13 | 2.53 |
| <i>KIF20B</i>       | 2.12 | 2.18 |
| <i>S100A2</i>       | 2.12 | 1.81 |
| <i>SMC2</i>         | 2.11 | 2.28 |
| <i>NLRP3</i>        | 2.11 | 2.64 |
| <i>PTTG1</i>        | 2.1  | 2.05 |
| <i>LOC100008588</i> | 2.1  | 1.09 |
| <i>HIPK2</i>        | 2.1  | 1.09 |
| <i>PKM2</i>         | 2.09 | 1.17 |
| <i>PLD5</i>         | 2.08 | 1.58 |
| <i>NEXN</i>         | 2.07 | 1.71 |
| <i>TRIP13</i>       | 2.07 | 3.91 |
| <i>NUSAP1</i>       | 2.05 | 2.27 |
| <i>GAS6</i>         | 2.05 | 0.93 |
| <i>C20orf127</i>    | 2.05 | 2.01 |
| <i>FER1L4</i>       | 2.03 | 1.26 |
| <i>PKM2</i>         | 2.03 | 1.18 |
| <i>FAM111A</i>      | 2.03 | 1.53 |
| <i>CYBASC3</i>      | 2.03 | 1.09 |
| <i>PID1</i>         | 2.03 | 2.68 |

|               |      |      |
|---------------|------|------|
| <i>NEDD8</i>  | 2.02 | 1.86 |
| <i>DNMT1</i>  | 2.02 | 1.98 |
| <i>SHISA2</i> | 2.02 | 4.89 |
| <i>ACTB</i>   | 2.02 | 1.91 |
| <i>FSTL1</i>  | 2.02 | 1.26 |
| <i>COMMD4</i> | 2.02 | 1.76 |
| <i>CDC2</i>   | 2.02 | 4.01 |
| <i>KYNU</i>   | 2.02 | 2.59 |
| <i>CD59</i>   | 2    | 1.28 |
| <i>LMNA</i>   | 2    | 2.02 |
| <i>PAQR4</i>  | 2    | 1.93 |

**Table S2:** Genes induced in A4 cells expressing Wt-STAT3 following IL-6 treatment

| Gene             | Wt + IL6/V + IL6<br>Fold Change | Wt + IL6/K685R + IL6<br>Fold Change |
|------------------|---------------------------------|-------------------------------------|
| <i>PDGFD</i>     | 13.45                           | 6.77                                |
| <i>GADD45G</i>   | 8.66                            | 1.17                                |
| <i>SERPINA1</i>  | 8.36                            | 1.58                                |
| <i>BCL3</i>      | 7.7                             | 1.02                                |
| <i>SNCAIP</i>    | 7.18                            | 1.66                                |
| <i>C22orf30</i>  | 4.94                            | 4.97                                |
| <i>TLL1</i>      | 4.68                            | 3.73                                |
| <i>LOC648374</i> | 4.05                            | 2.8                                 |
| <i>CXCL5</i>     | 3.92                            | 1.13                                |
| <i>HEXIM1</i>    | 3.88                            | 2.14                                |
| <i>MIR635</i>    | 3.67                            | 1.81                                |
| <i>LYPD1</i>     | 3.5                             | 1.03                                |
| <i>PPP2R3A</i>   | 3.34                            | 2.19                                |
| <i>PCDHGB6</i>   | 3.3                             | 14.57                               |
| <i>FAM135A</i>   | 3.15                            | 1.04                                |
| <i>AGPAT3</i>    | 3.12                            | 5.57                                |
| <i>ROR1</i>      | 3.12                            | 3.08                                |
| <i>PCDH7</i>     | 3.06                            | 1.13                                |
| <i>ARSB</i>      | 3.03                            | 1.29                                |
| <i>LRG1</i>      | 3.03                            | 1.49                                |
| <i>TEAD4</i>     | 2.82                            | 1.24                                |
| <i>LOC647955</i> | 2.81                            | 2.56                                |
| <i>CSN1S1</i>    | 2.77                            | 2.8                                 |
| <i>ZNF160</i>    | 2.75                            | 4.69                                |
| <i>TRIB2</i>     | 2.74                            | 1.19                                |
| <i>LOC649661</i> | 2.71                            | 2.11                                |
| <i>BHLHB2</i>    | 2.59                            | 1.02                                |
| <i>GCNT3</i>     | 2.51                            | 0.89                                |

|                     |      |      |
|---------------------|------|------|
| <i>EMP3</i>         | 2.51 | 2.49 |
| <i>MGC3032</i>      | 2.46 | 1.45 |
| <i>TRIM15</i>       | 2.44 | 1.05 |
| <i>OR4K15</i>       | 2.43 | 1.36 |
| <i>GPR37</i>        | 2.42 | 1.19 |
| <i>LOC100131017</i> | 2.42 | 1.34 |
| <i>LOC642082</i>    | 2.41 | 0.98 |
| <i>LOC390483</i>    | 2.39 | 2.66 |
| <i>LOC644284</i>    | 2.35 | 1.88 |
| <i>LOC653375</i>    | 2.33 | 1.34 |
| <i>LOC100129907</i> | 2.3  | 2.08 |
| <i>NT5M</i>         | 2.27 | 1.37 |
| <i>SFN</i>          | 2.25 | 1.07 |
| <i>LOC649445</i>    | 2.23 | 2.32 |
| <i>TRIM15</i>       | 2.23 | 0.92 |
| <i>UBE2J2</i>       | 2.17 | 1.54 |
| <i>HOXA2</i>        | 2.16 | 1.74 |
| <i>FCF1</i>         | 2.13 | 1.72 |
| <i>CHI3L1</i>       | 2.12 | 1    |
| <i>TBC1D2</i>       | 2.1  | 1    |
| <i>FUT2</i>         | 2.09 | 1.49 |
| <i>LARGE</i>        | 2.08 | 2.08 |
| <i>LOC729774</i>    | 2.06 | 1.55 |
| <i>S100A9</i>       | 2.05 | 1.4  |
| <i>TACSTD2</i>      | 2.04 | 1.01 |
| <i>RABL2A</i>       | 2.04 | 0.81 |
| <i>LOC283392</i>    | 2.03 | 1.58 |
| <i>PTPRE</i>        | 2.02 | 0.89 |
| <i>TANC1</i>        | 2.02 | 1.35 |
| <i>STOM</i>         | 2.02 | 1.03 |
| <i>CWC22</i>        | 2.01 | 1.41 |

**Table S3:** Genes induced in A4 cells expressing Y705F-STAT3 and hAT1R following angiotensin II treatment

| Gene             | YF + angII/V + angII<br>Fold Change | YF + angII/KR-YF + angII<br>Fold Change |
|------------------|-------------------------------------|-----------------------------------------|
| <i>USP40</i>     | 14.13                               | 6.07                                    |
| <i>ARHGEF10L</i> | 9.34                                | 183.92                                  |
| <i>RNF126P1</i>  | 6.74                                | 7.47                                    |
| <i>OR2B2</i>     | 5.39                                | 3.76                                    |
| <i>LOC645411</i> | 5.25                                | 3.8                                     |
| <i>LOC344328</i> | 5.17                                | 7.5                                     |
| <i>VANGL1</i>    | 4.51                                | 1.26                                    |

|                     |      |      |
|---------------------|------|------|
| <i>FAIM</i>         | 4.1  | 1.06 |
| <i>PLXND1</i>       | 3.91 | 3.02 |
| <i>TRIM39</i>       | 3.88 | 2.64 |
| <i>ARRB2</i>        | 3.71 | 8.41 |
| <i>DEPDC6</i>       | 3.58 | 1.56 |
| <i>LOC100128260</i> | 3.57 | 4.53 |
| <i>MOCS1</i>        | 3.51 | 1.31 |
| <i>C17orf98</i>     | 3.49 | 2.36 |
| <i>BRWD1</i>        | 3.31 | 1.99 |
| <i>SNX12</i>        | 3.11 | 1.74 |
| <i>RAPH1</i>        | 3.03 | 2.85 |
| <i>SPPL3</i>        | 2.98 | 1.31 |
| <i>L3MBTL3</i>      | 2.94 | 1.16 |
| <i>PRPF4B</i>       | 2.93 | 1.74 |
| <i>COPS2</i>        | 2.89 | 1.86 |
| <i>LOC100130494</i> | 2.87 | 2.72 |
| <i>LOC654074</i>    | 2.68 | 1.19 |
| <i>RECQL</i>        | 2.68 | 1.86 |
| <i>ACSS2</i>        | 2.63 | 1.62 |
| <i>SEC31A</i>       | 2.61 | 2.14 |
| <i>MOGAT2</i>       | 2.57 | 2.44 |
| <i>ABCC1</i>        | 2.56 | 0.95 |
| <i>ARL4D</i>        | 2.52 | 5.41 |
| <i>ZGPAT</i>        | 2.52 | 3.36 |
| <i>RFC2</i>         | 2.51 | 1.39 |
| <i>LOC642769</i>    | 2.51 | 1.78 |
| <i>CACYBP</i>       | 2.5  | 1.86 |
| <i>KIAA0226</i>     | 2.48 | 1.68 |
| <i>LOC646208</i>    | 2.46 | 2.31 |
| <i>ATF6B</i>        | 2.41 | 1    |
| <i>PLA2G10</i>      | 2.4  | 2.04 |
| <i>PYCR1</i>        | 2.4  | 1.47 |
| <i>IKZF3</i>        | 2.39 | 2.1  |
| <i>GSTZ1</i>        | 2.39 | 3.85 |
| <i>C4orf23</i>      | 2.38 | 2.07 |
| <i>GGA3</i>         | 2.38 | 1.71 |
| <i>LOC644037</i>    | 2.38 | 2.91 |
| <i>ISM1</i>         | 2.36 | 2.55 |
| <i>RUSC2</i>        | 2.35 | 3.42 |
| <i>JMJD1A</i>       | 2.34 | 0.83 |
| <i>LOC729404</i>    | 2.33 | 2.12 |
| <i>LOC100128525</i> | 2.32 | 1.1  |
| <i>LOC653113</i>    | 2.31 | 1.45 |

*K685 acetylation modulates U-STAT3 function*

|                  |      |        |
|------------------|------|--------|
| <i>DGKH</i>      | 2.31 | 2.11   |
| <i>LTA</i>       | 2.27 | 2.58   |
| <i>FLJ14166</i>  | 2.27 | 1.36   |
| <i>MGC71805</i>  | 2.26 | 2.44   |
| <i>LOC390578</i> | 2.26 | 1.99   |
| <i>SOS2</i>      | 2.25 | 2.34   |
| <i>CAPS</i>      | 2.23 | 2.23   |
| <i>LYPLA2P1</i>  | 2.22 | 1.61   |
| <i>LOC400879</i> | 2.2  | 2.32   |
| <i>GIYD2</i>     | 2.19 | 1.53   |
| <i>LOC650020</i> | 2.16 | 1.48   |
| <i>SNORA68</i>   | 2.16 | 2.72   |
| <i>FAM118A</i>   | 2.15 | 1.69   |
| <i>LOC388925</i> | 2.13 | 1.41   |
| <i>CAMK1D</i>    | 2.12 | 1.17   |
| <i>LOC647450</i> | 2.1  | 2.22   |
| <i>LOC158301</i> | 2.09 | 1.82   |
| <i>WAPAL</i>     | 2.08 | 484.41 |
| <i>LOC642502</i> | 2.06 | 1.74   |
| <i>C12orf77</i>  | 2.04 | 2.11   |
| <i>RTN2</i>      | 2.03 | 1.14   |
| <i>FZD6</i>      | 2.02 | 0.86   |
| <i>PWWP2A</i>    | 2.01 | 1.22   |

**Supplemental Method**

List of primers used for real-time quantitative PCR.

| Oligo name                | Oligo sequence (5' to 3') |
|---------------------------|---------------------------|
| <i>IL7R</i> Sense         | GGCTTCTGGAGTGAATGGAG      |
| <i>IL7R</i> Antisense     | AATGCTGATGGTTAGTAAGATAGG  |
|                           |                           |
| <i>CDC45L</i> Sense       | GCCAGTCAATGTCGTCAATG      |
| <i>CDC45L</i> Antisense   | CTCCACTATCTCCTCTTCTAACC   |
|                           |                           |
| <i>CSF2</i> Sense         | GCTGCTGAGATGAATGAAAC      |
| <i>CSF2</i> Antisense     | CAGTGCTGCTTGTAGTGG        |
|                           |                           |
| <i>SOCS3</i> Sense        | GAATGTCAGCCCAGTAAGTATTG   |
| <i>SOCS3</i> Antisense    | CAGCAGTCCAGCCTCTCC        |
|                           |                           |
| <i>SERPINA1</i> Sense     | CAAGGACACCGAGGAAGAG       |
| <i>SERPINA1</i> Antisense | TCAGGCAGGAAGAAGATGG       |
|                           |                           |
| <i>GADD45G</i> Sense      | ATCGCACTATGACTCTGGAAG     |
| <i>GADD45G</i> Antisense  | ACTTTGGCTGACTCGTAGAC      |
|                           |                           |
| <i>BCL3</i> Sense         | CGCCTCTCCATATTGCTGTG      |
| <i>BCL3</i> Antisense     | GTCTGCCGTAGGTTGTTGTAG     |
|                           |                           |
| <i>LTA</i> Sense          | CATCTACTTCGTCTACTCCCAGG   |
| <i>LTA</i> Antisense      | CCCCGTGGTACATCGAGTG       |
|                           |                           |
| <i>SOS2</i> Sense         | CCGCAGCCTTACGAGTTCTTC     |
| <i>SOS2</i> Antisense     | GGATGCACTTGTTCTGAACC      |
|                           |                           |
| <i>PLA2G10</i> Sense      | TGTGGGTTGTGTTGGTCCC       |
| <i>PLA2G10</i> Antisense  | GACGCTCTGATTGACGCACT      |
